# Supplementary material
Source: publisher figshare collection journal article supplement (https://acs.figshare.com/ndownloader/files/5086669)
Supplement: Supplementary file 1 [file 5086669]

## Supporting Information

1. NDMA photolysis using BLB (Black light blue: 300 ~ 400 nm) lamps under  $N_2$  and  $O_2$  saturations. ( $[NDMA]_0 = 0.1$  mM, pH = 7.0)

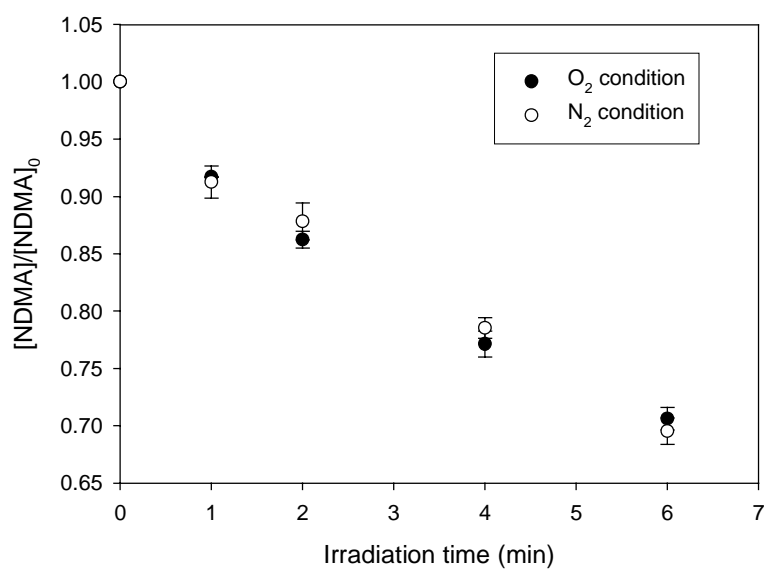

2. Increase of absorbance at 350 nm by the direct photolysis of TNM ( $[NDMA]_0 = 2.0 \times 10^{-3}$  M,  $[TNM]_0 = 1.1 \times 10^{-4}$  M)

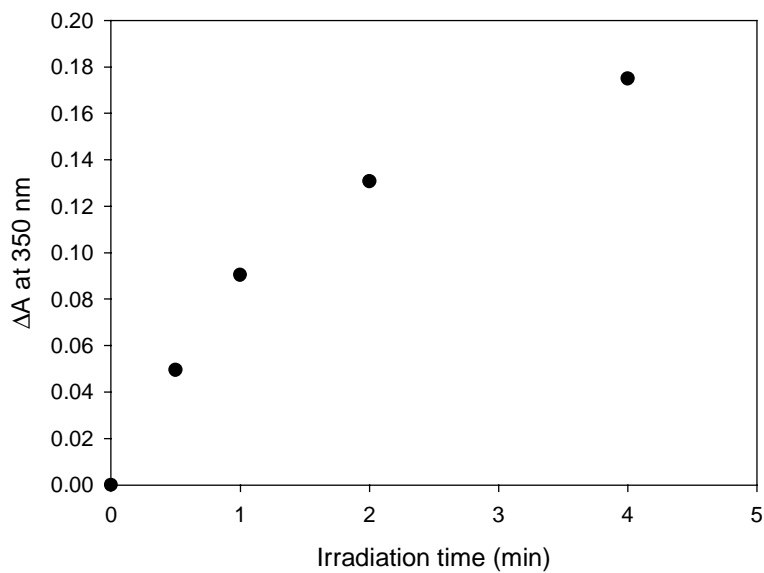

3. Yields of formate as a function of pH under N<sub>2</sub> saturation ([NDMA]<sub>0</sub> = 1.0×10<sup>-3</sup> M)

|               |                       |                       |                       |     |
|---------------|-----------------------|-----------------------|-----------------------|-----|
| pH            | 3                     | 5                     | 7                     | 8.2 |
| [formate] (M) | 2.15×10 <sup>-5</sup> | 2.09×10 <sup>-5</sup> | 1.69×10 <sup>-5</sup> | ND  |

4. Yields of MA and DMA after NDMA photolysis with 5 mM NO<sub>2</sub><sup>-</sup> addition.

([NDMA]<sub>0</sub> = 1.0×10<sup>-3</sup> M, pH 7.0)

[DMA]<sub>f</sub> = 0.964×10<sup>-3</sup> M, [MA]<sub>f</sub> = 4.8×10<sup>-5</sup> M
